# Supplementary material
Source: publisher site journal article supplement (https://www.dovepress.com/article/220785)
Supplement: Supplementary file 1 [file get_supplementary_file.php]

Sup Figure 1

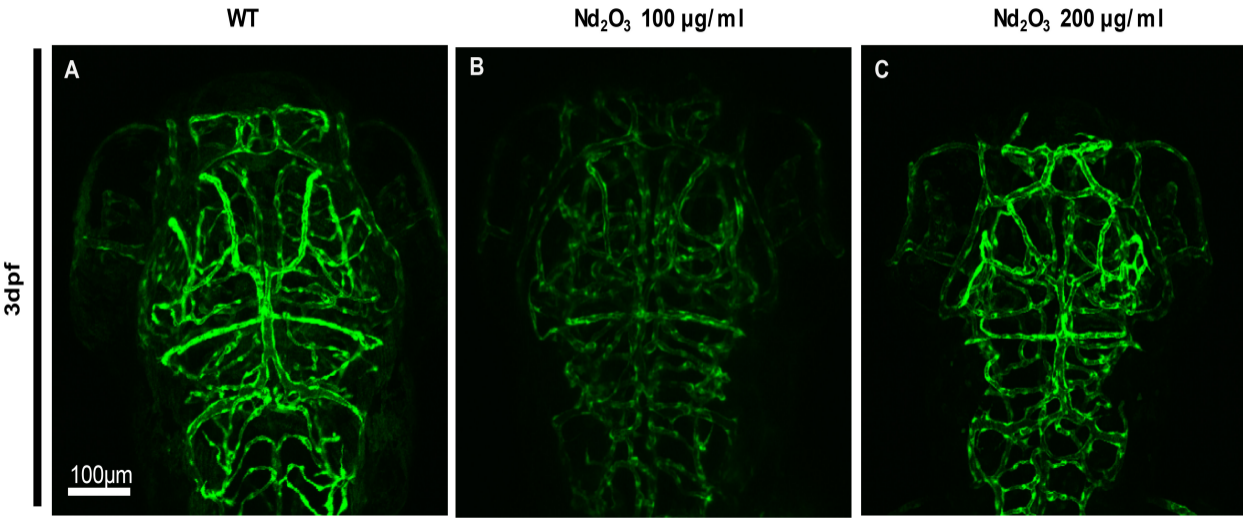

4 dpf

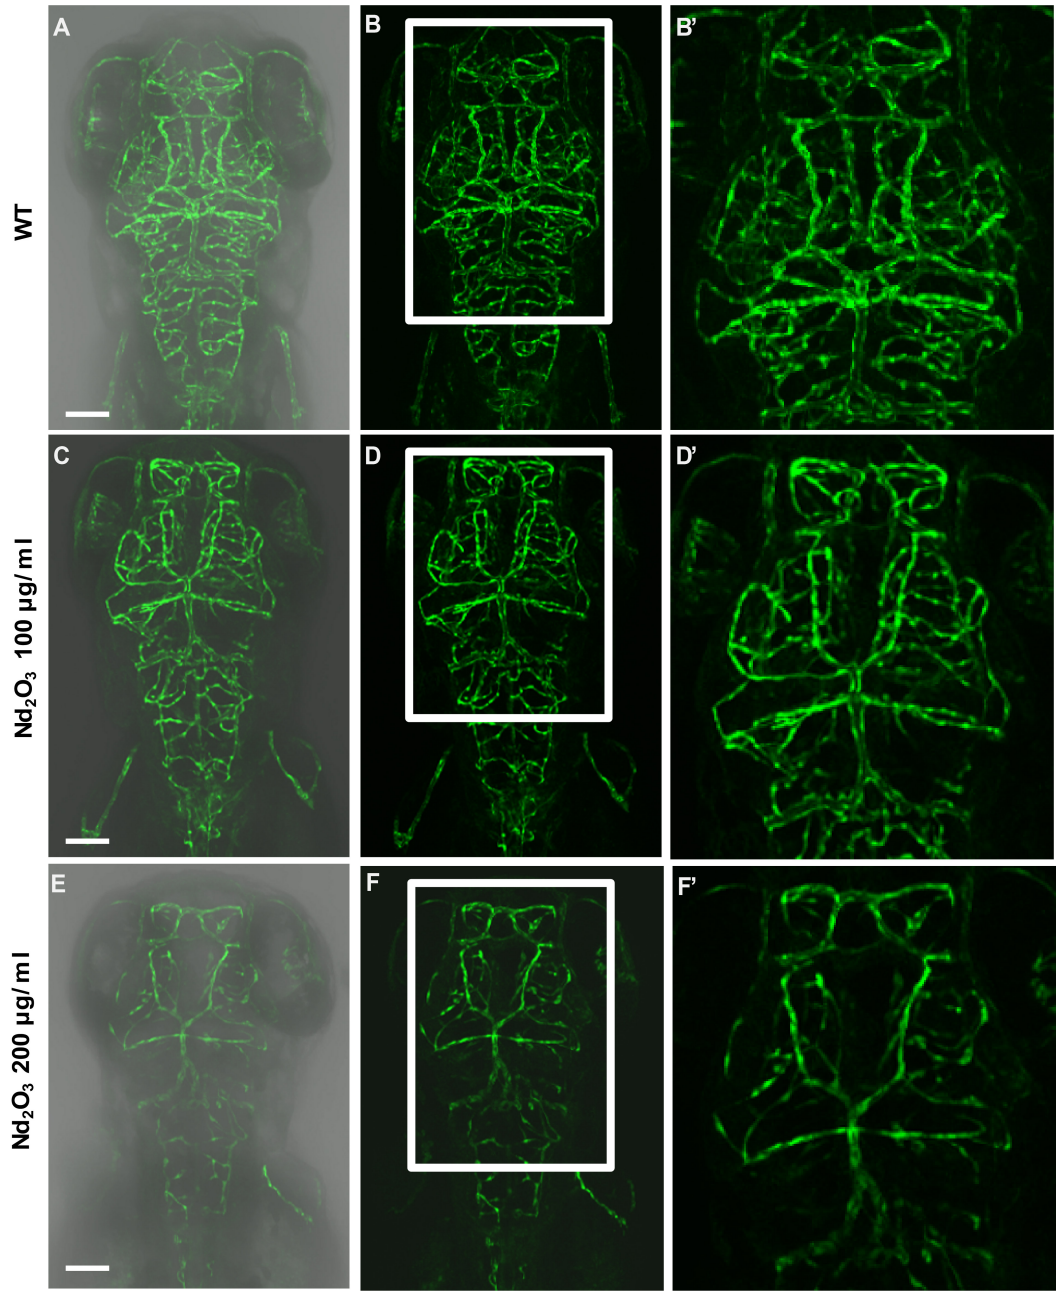

## Supporting Information Legends

**Figure S1.  $\text{Nd}_2\text{O}_3$  disturbed the cerebrovascular development at 3 dpf.** A The cerebrovascular images of wide type embryos. B The cerebrovascular images of embryos exposed to  $\text{Nd}_2\text{O}_3$  (100  $\mu\text{g/ml}$ ). C The cerebrovascular images of embryos exposed to  $\text{Nd}_2\text{O}_3$  (200  $\mu\text{g/ml}$ ). Scale bars, 100  $\mu\text{m}$ .

**Figure S2.  $\text{Nd}_2\text{O}_3$  disturbed the development of cerebrovascular at 4 dpf.** A, B, B' The cerebrovascular images of wide type embryo. C, D, D' The cerebrovascular images of embryos exposed to  $\text{Nd}_2\text{O}_3$  (100  $\mu\text{g/ml}$ ). E, F, F' The cerebrovascular images of embryos exposed to  $\text{Nd}_2\text{O}_3$  (200  $\mu\text{g/ml}$ ). Scale bars, 100  $\mu\text{m}$ .

**Movie S1 showed that  $\text{Nd}_2\text{O}_3$  NPs can be ingested by embryos, related to Figure 1.**

**Movie S2-3 showed the heart rate of embryos treated with  $\text{Nd}_2\text{O}_3$  reduced, related to Figure 3.** Movie 2 showed the heart rate of wild-type embryos, related to Figure 3; Movie 3 showed the heart rate of embryos treated with  $\text{Nd}_2\text{O}_3$ , related to Figure 3.

**Movie S4-5 showed the heart dysfunction (arrhythmia) can be recorded in embryos exposed to  $\text{Nd}_2\text{O}_3$ , related to Figure 3.**

**Movie S6-7 showed that cerebrovascular in  $\text{Nd}_2\text{O}_3$  embryos were vanished at 5 dpf, related to Figure 4.** Movie 6 showed cerebrovascular pattern of wide type embryos, related to Figure 4; Movie 7 showed cerebrovascular pattern of embryos treated with  $\text{Nd}_2\text{O}_3$ , related to Figure 4.

**Movie S8-10 showed  $\text{Nd}_2\text{O}_3$  disturbed vascular sprouting at 3 dpf, related to Figure 5.** Movie 8 showed vascular sprouting of wide type embryos, related to Figure 5; Movie 9 showed vascular sprouting of embryos treated with  $\text{Nd}_2\text{O}_3$  at 100  $\mu\text{g/ml}$ , related to Figure 5; Movie 10 showed vascular sprouting of embryos treated with  $\text{Nd}_2\text{O}_3$  at 200  $\mu\text{g/ml}$ , related to Figure 5.
